# Supplementary material for: High Prevalence of a Hotspot of Noncoding Somatic Mutations in Intron 6 of GPR126 in Bladder Cancer
Source: Oxford University Press journal article supplement (doi:10.1158/1541-7786.mcr-18-0363), 2018-11-06
Supplement: 15417786mcr180363-sup-199960_3_supp_5069594_pfyp10.docx [file 15417786mcr180363-sup-199960_3_supp_5069594_pfyp10.docx]

**Supplemental table 1:** Relationship between *GPR126* mutation status and standard clinical pathological and biological parameters in bladder cancer

|  |  |  |  |  |
| --- | --- | --- | --- | --- |
|  | **Total population (%)** | ***GPR126*   mutated** | ***GPR126* not mutated** | ***p* *** |
| **n (%)** | **n (%)** |
|  |  |  |  |  |
| **Total population** | 103 (100.0) | 47 (45.6) | 56 (54.4) |  |
| **Age** (years) |  |  |  |  |
| ≥60 | 77 (74.8) | 38 (49.4) | 39 (50.6) | 0.19 |
| <60 | 26 (25.2) | 9 (34.6) | 17 (65.4) |  |
| **Sex** |  |  |  |  |
| Male | 86 (83.5) | 33 (38.4) | 53 (61.6) | **0.0009** |
| Female | 17 (16.5) | 14 (82.4) | 3 (17.6) |  |
| **Smoking statusa** |  |  |  |  |
| Non-smoker | 28 (28.9) | 17 (60.7) | 11 (39.3) | 0.095 |
| Smoker | 69 (71.1) | 29 (42.0) | 40 (58.0) |  |
| **History of NMIBC** |  |  |  |  |
| No | 59 (57.3) | 20 (33.9) | 39 (66.1) | **0.0056** |
| Yes | 44 (42.7) | 27 (61.4) | 17 (38.6) |  |
| **Associated pTis** |  |  |  |  |
| No | 94 (91.3) | 42 (44.7) | 52 (55.3) | 0.78 |
| Yes | 9 (8.7) | 5 (55.6) | 4 (44.4) |  |
| ***FGFR3* status** |  |  |  |  |
| Mutated | 28 (27.2) | 17 (60.7) | 11 (39.3) | 0.060 |
| Not mutated | 75 (72.8) | 30 (40.0) | 45 (60.0) |  |
| ***PIK3CA* status** |  |  |  |  |
| Mutated | 13 (12.6) | 8 (61.5) | 5 (38.5) | 0.22 |
| Not mutated | 90 (87.4) | 39 (43.3) | 51 (56.7) |  |

* Chi2 test, Chi2 test with Yates’ correction if appropriate

a data available for 97 patients
